# Supplementary material for: An effective strategy for CO2 reduction to C1 products using Cu-embedded MoS2 electrocatalyst: DFT study
Source: Royal Society of Chemistry journal article supplement (doi:10.1039/d3nj00716b), 2023-01-01
Supplement: d3nj00716b1.pdf [file d3nj00716b1.pdf]

## ELECTRONIC SUPPLEMENTARY INFORMATION

### LIST OF FIGURES

|    |                                                                                                                                                    |   |
|----|----------------------------------------------------------------------------------------------------------------------------------------------------|---|
| S1 | Diffusion pathways for migration of single Cu atom from sulfur vacancy to nearby Mo-top site (red-line) and hollow site (black-line). . . . .      | 2 |
| S2 | Projected density of states (PDOS) plot of Cu-MoS <sub>2</sub> . . . . .                                                                           | 3 |
| S3 | Gibbs free energy diagram of HER on Cu embedded MoS <sub>2</sub> monolayer. . . . .                                                                | 4 |
| S4 | Gibbs free energy diagram of complete reaction path of CO <sub>2</sub> RR on Cu-MoS <sub>2</sub> along C1 pathway. . . . .                         | 5 |
| S5 | Gibbs free energy diagram for CO <sub>2</sub> RR to CH <sub>4</sub> on Cu-MoS <sub>2</sub> with solvent effect. . . . .                            | 6 |
| S6 | Projected density of states (PDOS) plot of various intermediates with Cu-3d on Cu-MoS <sub>2</sub> involved in CO <sub>2</sub> RR process. . . . . | 7 |
| S7 | DFT-D3 optimized structures of various intermediates involved in CO <sub>2</sub> RR on the Cu-MoS <sub>2</sub> monolayer. . . . .                  | 8 |

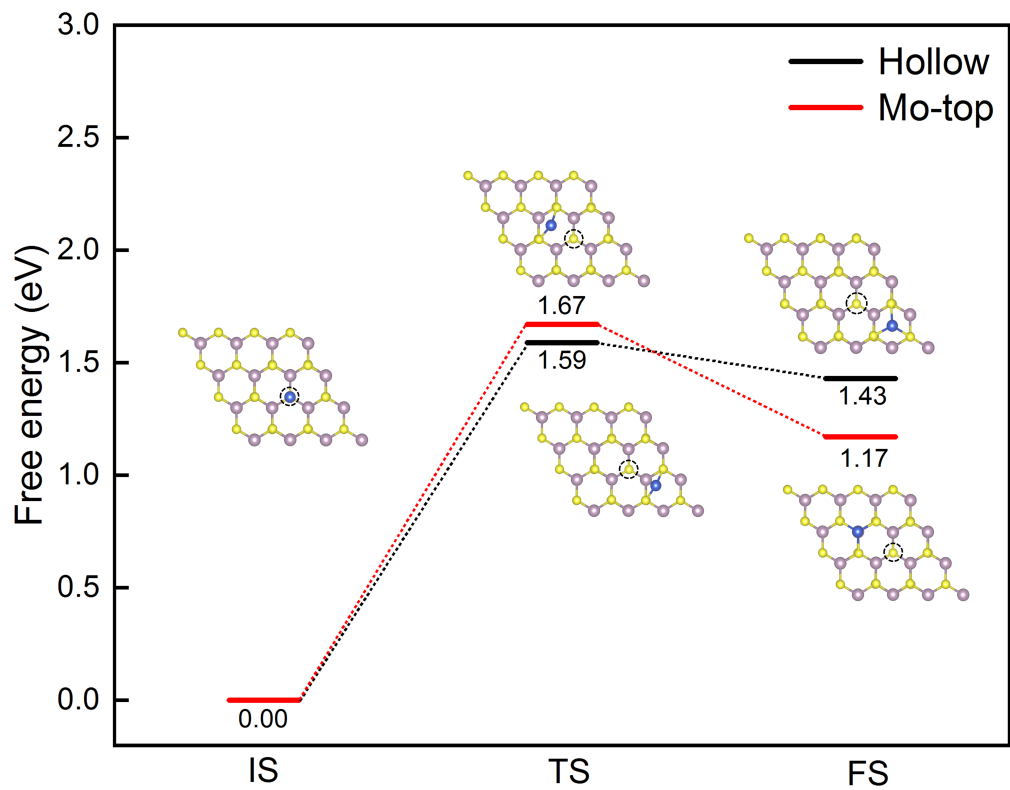

FIG. S1. Diffusion pathways for migration of single Cu atom from sulfur vacancy to nearby Mo-top site (red-line) and hollow site (black-line).

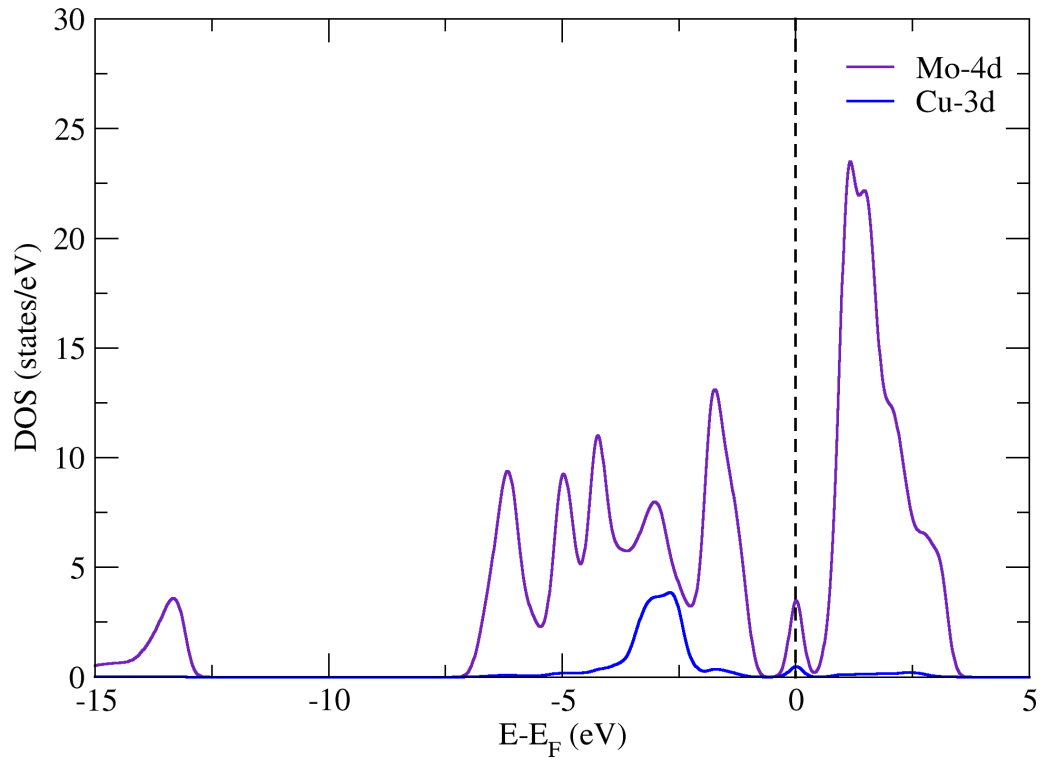

FIG. S2. Projected density of states (PDOS) plot of Cu-MoS<sub>2</sub>.

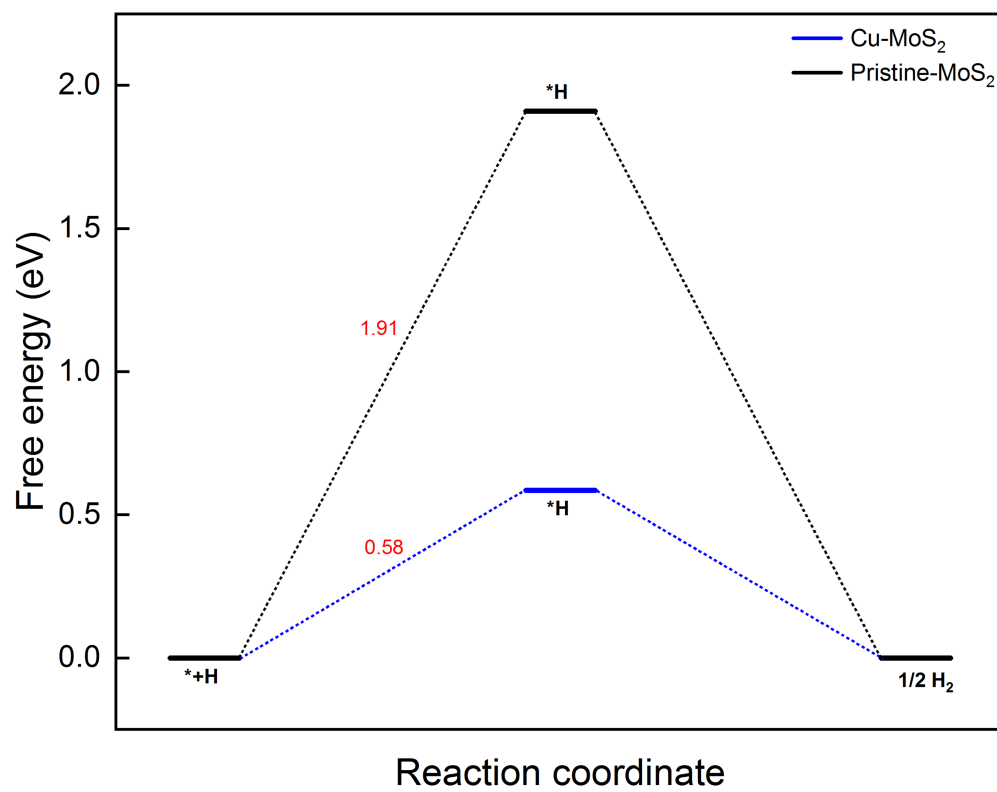

FIG. S3. Gibbs free energy diagram of HER on Cu embedded MoS<sub>2</sub> monolayer.

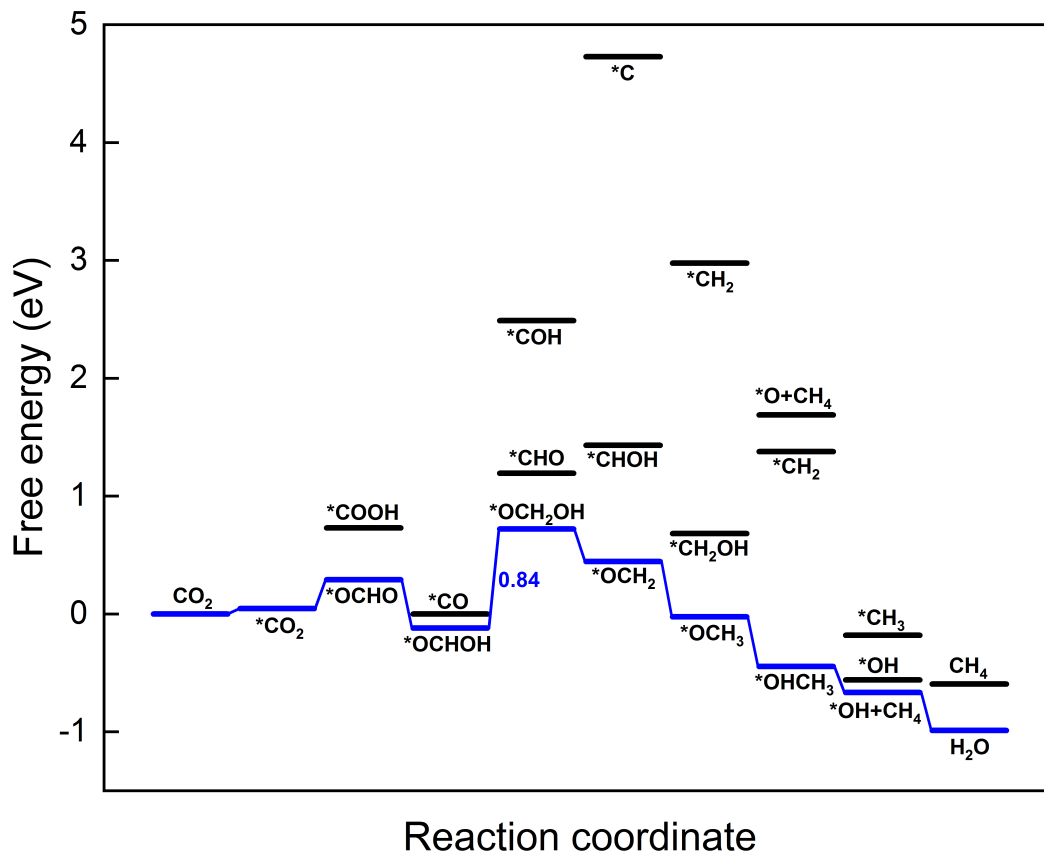

FIG. S4. Gibbs free energy diagram of complete reaction path of CO<sub>2</sub>RR on Cu-MoS<sub>2</sub> along C1 pathway.

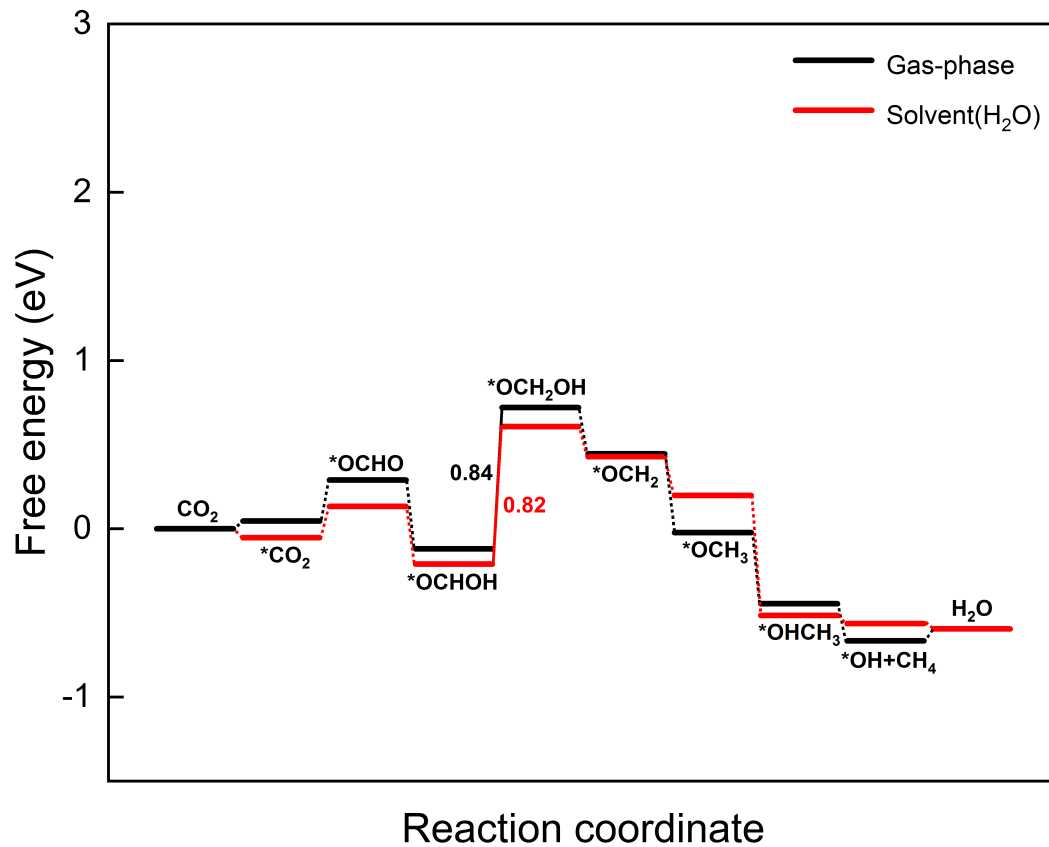

FIG. S5. Gibbs free energy diagram for CO<sub>2</sub>RR to CH<sub>4</sub> on Cu-MoS<sub>2</sub> with solvent effect.

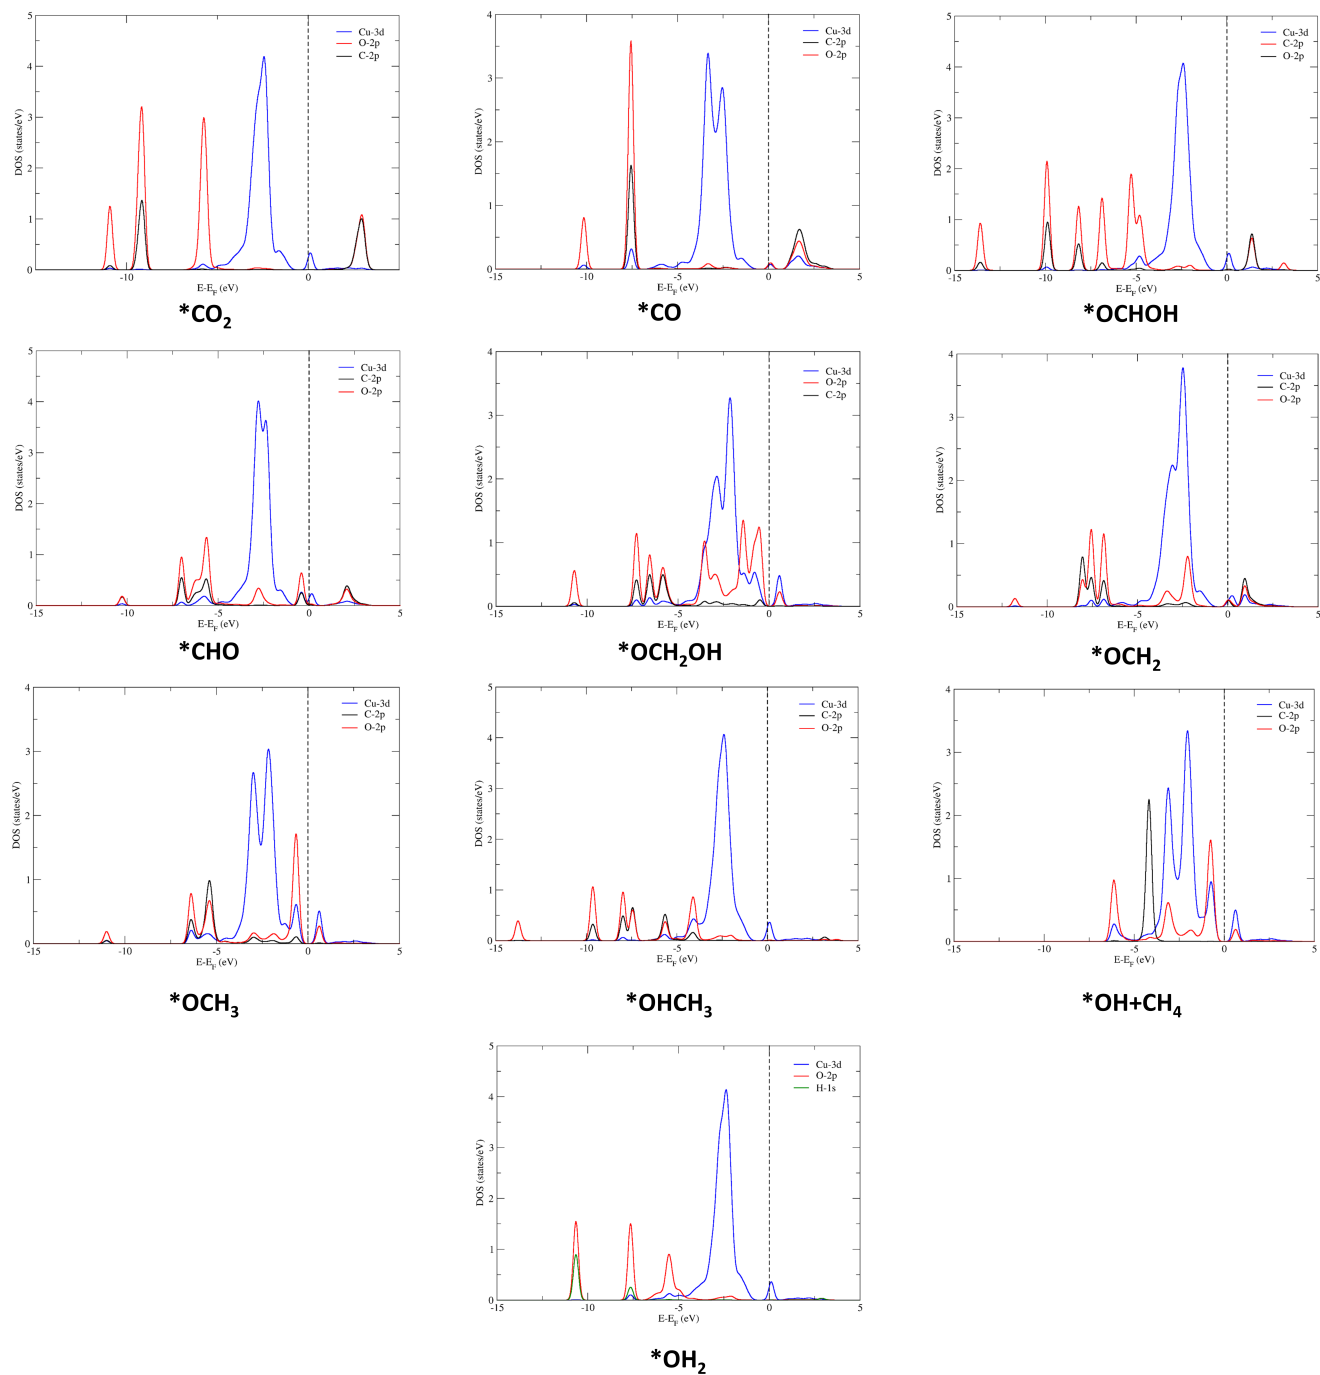

FIG. S6. Projected density of states (PDOS) plot of various intermediates with Cu-3d on Cu-MoS<sub>2</sub> involved in CO<sub>2</sub>RR process.

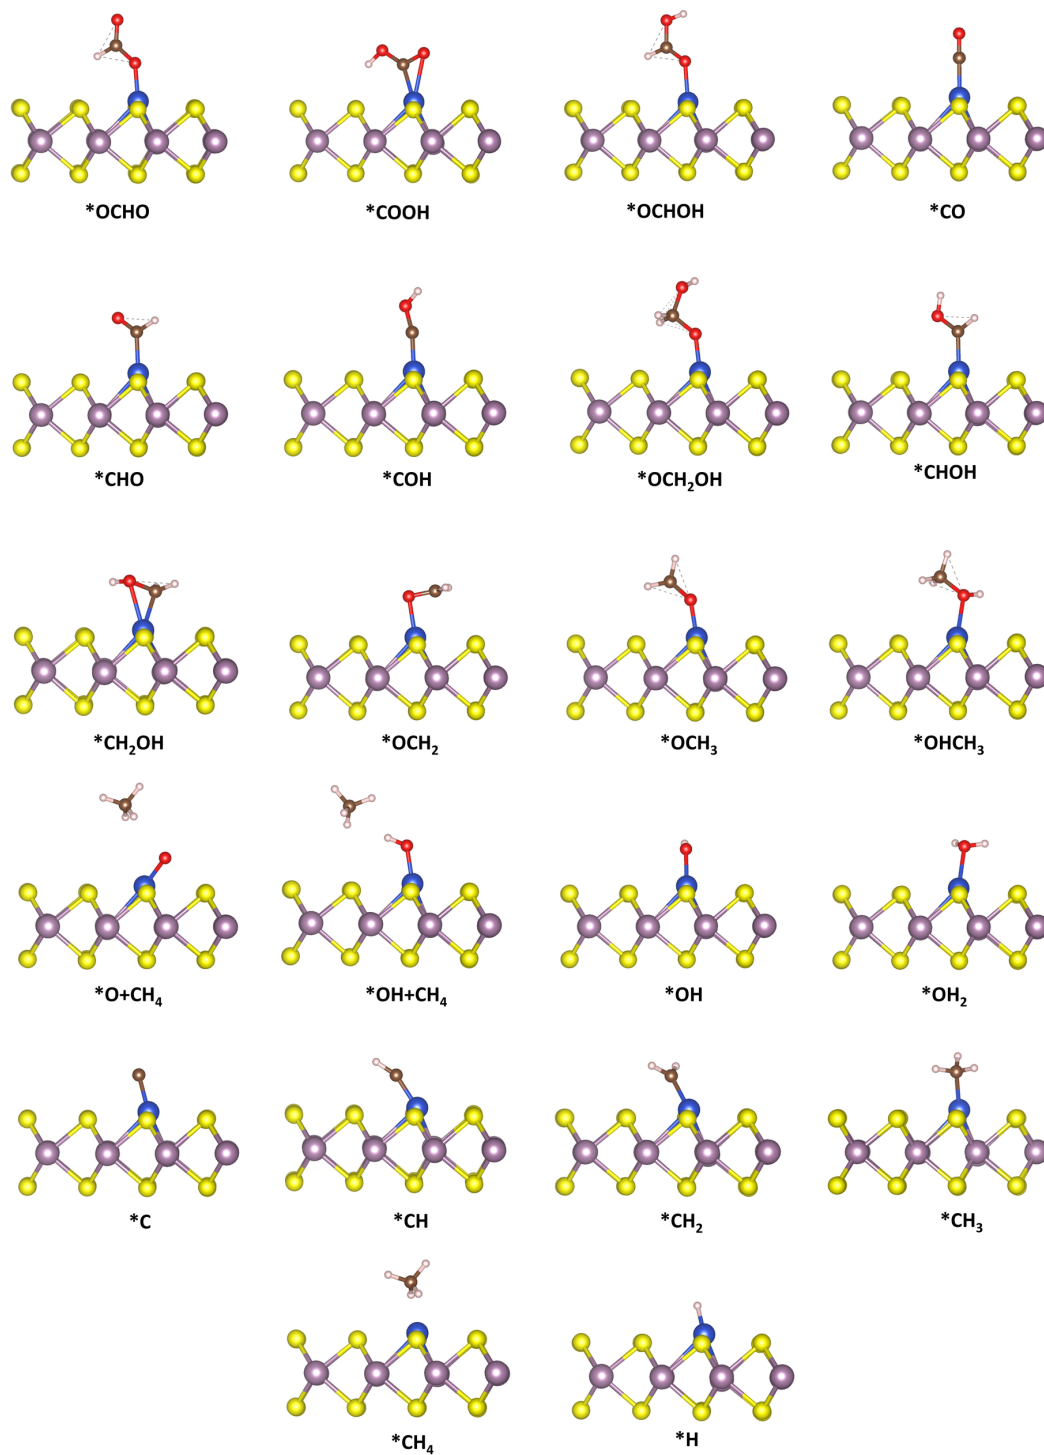

FIG. S7. DFT-D3 optimized structures of various intermediates involved in CO<sub>2</sub>RR on the Cu-MoS<sub>2</sub> monolayer.
